# Supplementary material for: Public perception of ecosystem services provided by the Mediterranean mussel Mytilus galloprovincialis related to anthropogenic activities
Source: PubMed Central journal article supplement (PMC8449534; doi:10.7717/peerj.11975), 2021-09-15
Supplement: peerj-09-11975-s001.pdf [file peerj-09-11975-s001.pdf]

## **RECREATIONAL HARVESTING**

Collection of mussels as recreational activity.

## **HUMAN FOOD**

Mussels are used as food resource in human feeding.

---

## **HABITAT FOR OTHER SPECIES**

Mussels provide particular conditions harbouring many species that live and find protection in mussel beds.

## **PURIFICATION OF SEAWATER**

Mussels are filter-feeders and thus able to remove pollutants from the seawater improving thus its quality.

---

## **ORNAMENTATION**

Shells of mussels are used, for instance, in jewellery, handicraft and decoration.

## **FOOD FOR OTHER SPECIES**

Mussels provide food for other species such as octopus, seastars or birds.

---

## **SCIENTIFIC AND TRADITIONAL KNOWLEDGE**

Scientific and traditional knowledge acquired by the study of mussels.

## **EXISTENTIAL VALUE**

We should have the moral obligation of protecting and conserving species as mussels.

---
