# Supplementary material for: Public perception of ecosystem services provided by the Mediterranean mussel Mytilus galloprovincialis related to anthropogenic activities
Source: PubMed Central journal article supplement (PMC8449534; doi:10.7717/peerj.11975), 2021-09-15
Supplement: peerj-09-11975-s002.pdf [file peerj-09-11975-s002.pdf]

**Table S2.** Results of Chi-squared tests assessing the influence of respondent profile on the perceived importance of mussels for human well-being and life quality (Q1), quantity of benefits provided by mussels (Q2), the importance of different ecosystem services provided by mussels (Q5), their state in the last 10 years (Q6), the condition of mussel beds (Q7) and the influence of the different environmental and anthropogenic factors on mussel beds. Significant differences ( $p < 0.05$ ) indicated in bold.

| Question                             | Profile                    | $\chi^2$                                                      |
|--------------------------------------|----------------------------|---------------------------------------------------------------|
| <b>Q1</b>                            | Sex                        | $\chi^2 = 0.164$ , d.f. = 2, $p = 0.921$                      |
|                                      | Age                        | $\chi^2 = 3.196$ , d.f. = 4, $p = 0.526$                      |
|                                      | <b>Education</b>           | $\chi^2 = 10.882$ , d.f. = 4, <b><math>p &lt; 0.05</math></b> |
|                                      | Visitor/Resident           | $\chi^2 = 5.326$ , d.f. = 2, $p = 0.070$                      |
|                                      | Urban/Non-urban            | $\chi^2 = 0.585$ , d.f. = 2, $p = 0.746$                      |
|                                      | Coastal/Non-coastal        | $\chi^2 = 4.589$ , d.f. = 2, <b><math>p = 0.101</math></b>    |
| <b>Q2</b>                            | Sex                        | $\chi^2 = 5.012$ , d.f. = 2, $p = 0.082$                      |
|                                      | <b>Age</b>                 | $\chi^2 = 9.501$ , d.f. = 4, <b><math>p &lt; 0.05</math></b>  |
|                                      | <b>Education</b>           | $\chi^2 = 14.838$ , d.f. = 4, <b><math>p &lt; 0.01</math></b> |
|                                      | Visitor/Resident           | $\chi^2 = 0.210$ , d.f. = 2, $p = 0.901$                      |
|                                      | Urban/Non-urban            | $\chi^2 = 3.442$ , d.f. = 2, $p = 0.179$                      |
|                                      | Coastal/Non-coastal        | $\chi^2 = 0.738$ , d.f. = 2, $p = 0.691$                      |
| <b>Q5</b>                            | Harvesting as recreation   |                                                               |
|                                      | Sex                        | $\chi^2 = 1.312$ , d.f. = 2, $p = 0.519$                      |
|                                      | Age                        | $\chi^2 = 4.116$ , d.f. = 4, $p = 0.391$                      |
|                                      | Education                  | $\chi^2 = 5.145$ , d.f. = 4, $p = 0.273$                      |
|                                      | <b>Visitor/Resident</b>    | $\chi^2 = 6.133$ , d.f. = 2, <b><math>p &lt; 0.05</math></b>  |
|                                      | Urban/Non-urban            | $\chi^2 = 2.399$ , d.f. = 2, $p = 0.301$                      |
| Habitat for other species            | <b>Coastal/Non-coastal</b> | $\chi^2 = 8.114$ , d.f. = 2, <b><math>p &lt; 0.05</math></b>  |
|                                      | Sex                        | $\chi^2 = 0.961$ , d.f. = 2, $p = 0.619$                      |
|                                      | Age                        | $\chi^2 = 3.302$ , d.f. = 4, $p = 0.509$                      |
|                                      | Education                  | $\chi^2 = 0.174$ , d.f. = 4, $p = 0.996$                      |
|                                      | Visitor/Resident           | $\chi^2 = 2.431$ , d.f. = 2, $p = 0.297$                      |
|                                      | Urban/Non-urban            | $\chi^2 = 0.081$ , d.f. = 2, $p = 0.960$                      |
| Ornamentation                        | Coastal/Non-coastal        | $\chi^2 = 1.911$ , d.f. = 2, $p = 0.385$                      |
|                                      | Sex                        | $\chi^2 = 0.043$ , d.f. = 1, $p = 0.836$                      |
|                                      | Age                        | $\chi^2 = 3.225$ , d.f. = 2, $p = 0.199$                      |
|                                      | Education                  | $\chi^2 = 0.750$ , d.f. = 2, $p = 0.687$                      |
|                                      | Visitor/Resident           | $\chi^2 = 0.075$ , d.f. = 1, $p = 0.784$                      |
|                                      | Urban/Non-urban            | $\chi^2 = 0.047$ , d.f. = 1, $p = 0.829$                      |
| Scientific and traditional knowledge | Coastal/Non-coastal        | $\chi^2 = 0.500$ , d.f. = 1, $p = 0.480$                      |
|                                      | Sex                        | $\chi^2 = 4.428$ , d.f. = 2, $p = 0.109$                      |
|                                      | Age                        | $\chi^2 = 3.501$ , d.f. = 4, $p = 0.478$                      |
|                                      | Education                  | $\chi^2 = 2.574$ , d.f. = 4, $p = 0.631$                      |
|                                      | Visitor/Resident           | $\chi^2 = 2.163$ , d.f. = 2, $p = 0.339$                      |
|                                      | Urban/Non-urban            | $\chi^2 = 2.408$ , d.f. = 2, $p = 0.300$                      |
| Human food                           | Coastal/Non-coastal        | $\chi^2 = 2.842$ , d.f. = 2, $p = 0.241$                      |
|                                      | Sex                        | $\chi^2 = 2.905$ , d.f. = 2, $p = 0.234$                      |
|                                      | <b>Age</b>                 | $\chi^2 = 10.042$ , d.f. = 4, <b><math>p &lt; 0.05</math></b> |
|                                      | <b>Education</b>           | $\chi^2 = 14.329$ , d.f. = 4, <b><math>p &lt; 0.01</math></b> |
|                                      | Visitor/Resident           | $\chi^2 = 0.997$ , d.f. = 2, $p = 0.607$                      |
|                                      | Urban/Non-urban            | $\chi^2 = 0.824$ , d.f. = 2, $p = 0.662$                      |
| Purification of seawater             | Coastal/Non-coastal        | $\chi^2 = 0.240$ , d.f. = 2, $p = 0.887$                      |
|                                      | Sex                        | $\chi^2 = 1.222$ , d.f. = 2, $p = 0.543$                      |
|                                      | Age                        | $\chi^2 = 6.978$ , d.f. = 4, $p = 0.137$                      |
|                                      | Education                  | $\chi^2 = 1.611$ , d.f. = 4, $p = 0.807$                      |
|                                      | Visitor/Resident           | $\chi^2 = 2.988$ , d.f. = 2, $p = 0.224$                      |
|                                      | Urban/Non-urban            | $\chi^2 = 2.836$ , d.f. = 2, $p = 0.242$                      |
|                                      | Coastal/Non-coastal        | $\chi^2 = 0.567$ , d.f. = 2, $p = 0.753$                      |

| Question                             | Profile                 | $\chi^2$                                         |
|--------------------------------------|-------------------------|--------------------------------------------------|
| <b>Q5</b>                            |                         |                                                  |
| Food for other species               | Sex                     | $\chi^2 = 2.704$ , d.f. = 2, p = 0.259           |
|                                      | Age                     | $\chi^2 = 5.639$ , d.f. = 4, p = 0.228           |
|                                      | Education               | $\chi^2 = 0.713$ , d.f. = 4, p = 0.950           |
|                                      | Visitor/Resident        | $\chi^2 = 0.040$ , d.f. = 2, p = 0.980           |
|                                      | Urban/Non-urban         | $\chi^2 = 1.814$ , d.f. = 2, p = 0.404           |
|                                      | Coastal/Non-coastal     | $\chi^2 = 0.243$ , d.f. = 2, p = 0.886           |
| Existential value                    | Sex                     | $\chi^2 = 2.972$ , d.f. = 2, p = 0.226           |
|                                      | Age                     | $\chi^2 = 2.191$ , d.f. = 4, p = 0.701           |
|                                      | Education               | $\chi^2 = 4.068$ , d.f. = 4, p = 0.397           |
|                                      | Visitor/Resident        | $\chi^2 = 5.816$ , d.f. = 2, p = 0.055           |
|                                      | Urban/Non-urban         | $\chi^2 = 1.892$ , d.f. = 2, p = 0.388           |
|                                      | Coastal/Non-coastal     | $\chi^2 = 0.736$ , d.f. = 2, p = 0.692           |
| <b>Q6</b>                            |                         |                                                  |
| Harvesting as recreation             | Sex                     | $\chi^2 = 2.932$ , d.f. = 3, p = 0.402           |
|                                      | Age                     | $\chi^2 = 8.168$ , d.f. = 6, p = 0.226           |
|                                      | Education               | $\chi^2 = 2.641$ , d.f. = 6, p = 0.852           |
|                                      | <b>Visitor/Resident</b> | $\chi^2 = 9.900$ , d.f. = 3, <b>p &lt; 0.05</b>  |
|                                      | Urban/Non-urban         | $\chi^2 = 1.308$ , d.f. = 3, p = 0.727           |
|                                      | Coastal/Non-coastal     | $\chi^2 = 2.942$ , d.f. = 3, p = 0.401           |
| Habitat for other species            | Sex                     | $\chi^2 = 4.872$ , d.f. = 3, p = 0.181           |
|                                      | Age                     | $\chi^2 = 3.402$ , d.f. = 6, p = 0.757           |
|                                      | Education               | $\chi^2 = 4.502$ , d.f. = 6, p = 0.609           |
|                                      | Visitor/Resident        | $\chi^2 = 7.692$ , d.f. = 3, p = 0.053           |
|                                      | Urban/Non-urban         | $\chi^2 = 1.313$ , d.f. = 3, p = 0.726           |
|                                      | Coastal/Non-coastal     | $\chi^2 = 5.984$ , d.f. = 3, p = 0.112           |
| Ornamentation                        | Sex                     | $\chi^2 = 2.057$ , d.f. = 3, p = 0.561           |
|                                      | Age                     | $\chi^2 = 4.950$ , d.f. = 6, p = 0.550           |
|                                      | Education               | $\chi^2 = 7.500$ , d.f. = 6, p = 0.277           |
|                                      | Visitor/Resident        | $\chi^2 = 1.800$ , d.f. = 3, p = 0.615           |
|                                      | <b>Urban/Non-urban</b>  | $\chi^2 = 8.625$ , d.f. = 3, <b>p &lt; 0.05</b>  |
|                                      | Coastal/Non-coastal     | $\chi^2 = 4.444$ , d.f. = 3, p = 0.217           |
| Scientific and traditional knowledge | Sex                     | $\chi^2 = 4.068$ , d.f. = 3, p = 0.254           |
|                                      | Age                     | $\chi^2 = 7.742$ , d.f. = 6, p = 0.258           |
|                                      | Education               | $\chi^2 = 4.148$ , d.f. = 6, p = 0.657           |
|                                      | Visitor/Resident        | $\chi^2 = 1.458$ , d.f. = 3, p = 0.692           |
|                                      | Urban/Non-urban         | $\chi^2 = 4.508$ , d.f. = 3, p = 0.212           |
|                                      | Coastal/Non-coastal     | $\chi^2 = 1.348$ , d.f. = 3, p = 0.718           |
| Human food                           | Sex                     | $\chi^2 = 3.022$ , d.f. = 3, p = 0.388           |
|                                      | Age                     | $\chi^2 = 4.844$ , d.f. = 6, p = 0.564           |
|                                      | Education               | $\chi^2 = 7.052$ , d.f. = 6, p = 0.316           |
|                                      | Visitor/Resident        | $\chi^2 = 2.962$ , d.f. = 3, p = 0.398           |
|                                      | Urban/Non-urban         | $\chi^2 = 3.341$ , d.f. = 3, p = 0.342           |
|                                      | Coastal/Non-coastal     | $\chi^2 = 2.371$ , d.f. = 3, p = 0.499           |
| Purification of seawater             | Sex                     | $\chi^2 = 1.225$ , d.f. = 3, p = 0.747           |
|                                      | <b>Age</b>              | $\chi^2 = 16.146$ , d.f. = 6, <b>p &lt; 0.05</b> |
|                                      | Education               | $\chi^2 = 3.579$ , d.f. = 6, p = 0.733           |
|                                      | Visitor/Resident        | $\chi^2 = 4.245$ , d.f. = 3, p = 0.236           |
|                                      | Urban/Non-urban         | $\chi^2 = 2.292$ , d.f. = 3, p = 0.514           |
|                                      | Coastal/Non-coastal     | $\chi^2 = 3.636$ , d.f. = 3, p = 0.303           |
| Food for other species               | Sex                     | $\chi^2 = 2.211$ , d.f. = 3, p = 0.530           |
|                                      | <b>Age</b>              | $\chi^2 = 19.891$ , d.f. = 6, <b>p &lt; 0.01</b> |
|                                      | Education               | $\chi^2 = 10.624$ , d.f. = 6, p = 0.101          |
|                                      | Visitor/Resident        | $\chi^2 = 3.488$ , d.f. = 3, p = 0.322           |
|                                      | Urban/Non-urban         | $\chi^2 = 3.876$ , d.f. = 3, p = 0.275           |
|                                      | Coastal/Non-coastal     | $\chi^2 = 4.510$ , d.f. = 3, p = 0.211           |

| Question                 | Profile                    | $\chi^2$                                          |
|--------------------------|----------------------------|---------------------------------------------------|
| <b>Q6</b>                |                            |                                                   |
| Existential value        | Sex                        | $\chi^2 = 2.266$ , d.f. = 3, p = 0.519            |
|                          | Age                        | $\chi^2 = 10.288$ , d.f. = 6, p = 0.113           |
|                          | Education                  | $\chi^2 = 7.002$ , d.f. = 6, p = 0.321            |
|                          | <b>Visitor/Resident</b>    | $\chi^2 = 17.047$ , d.f. = 3, <b>p &lt; 0.01</b>  |
|                          | Urban/Non-urban            | $\chi^2 = 4.749$ , d.f. = 3, p = 0.191            |
|                          | <b>Coastal/Non-coastal</b> | $\chi^2 = 12.147$ , d.f. = 3, <b>p &lt; 0.01</b>  |
| <b>Q7</b>                |                            |                                                   |
|                          | Sex                        | $\chi^2 = 1.321$ , d.f. = 2, p = 0.517            |
|                          | Age                        | $\chi^2 = 5.881$ , d.f. = 4, p = 0.208            |
|                          | Education                  | $\chi^2 = 6.209$ , d.f. = 4, p = 0.184            |
|                          | <b>Visitor/Resident</b>    | $\chi^2 = 11.313$ , d.f. = 2, <b>p &lt; 0.01</b>  |
|                          | Urban/Non-urban            | $\chi^2 = 3.316$ , d.f. = 2, p = 0.191            |
|                          | <b>Coastal/Non-coastal</b> | $\chi^2 = 15.956$ , d.f. = 2, <b>p &lt; 0.01</b>  |
| <b>Q8</b>                |                            |                                                   |
| Climate alterations      | Sex                        | $\chi^2 = 5.251$ , d.f. = 3, p = 0.154            |
|                          | Age                        | $\chi^2 = 7.559$ , d.f. = 6, p = 0.272            |
|                          | Education                  | $\chi^2 = 8.391$ , d.f. = 6, p = 0.211            |
|                          | Visitor/Resident           | $\chi^2 = 2.593$ , d.f. = 3, p = 0.458            |
|                          | Urban/Non-urban            | $\chi^2 = 0.855$ , d.f. = 3, p = 0.836            |
|                          | Coastal/Non-coastal        | $\chi^2 = 1.843$ , d.f. = 3, p = 0.606            |
| Seaside tourism          | <b>Sex</b>                 | $\chi^2 = 9.066$ , d.f. = 3, <b>p &lt; 0.05</b>   |
|                          | <b>Age</b>                 | $\chi^2 = 29.297$ , d.f. = 6, <b>p &lt; 0.001</b> |
|                          | <b>Education</b>           | $\chi^2 = 28.860$ , d.f. = 6, <b>p &lt; 0.001</b> |
|                          | Visitor/Resident           | $\chi^2 = 4.488$ , d.f. = 3, p = 0.213            |
|                          | Urban/Non-urban            | $\chi^2 = 1.168$ , d.f. = 3, p = 0.761            |
|                          | Coastal/Non-coastal        | $\chi^2 = 2.583$ , d.f. = 3, p = 0.460            |
| Environmental management | <b>Sex</b>                 | $\chi^2 = 9.589$ , d.f. = 3, <b>p &lt; 0.05</b>   |
|                          | Age                        | $\chi^2 = 1.354$ , d.f. = 6, p = 0.969            |
|                          | Education                  | $\chi^2 = 7.900$ , d.f. = 6, p = 0.246            |
|                          | Visitor/Resident           | $\chi^2 = 2.226$ , d.f. = 3, p = 0.527            |
|                          | Urban/Non-urban            | $\chi^2 = 1.764$ , d.f. = 3, p = 0.623            |
|                          | Coastal/Non-coastal        | $\chi^2 = 1.545$ , d.f. = 3, p = 0.672            |
| Pollution                | Sex                        | $\chi^2 = 5.321$ , d.f. = 3, p = 0.150            |
|                          | Age                        | $\chi^2 = 11.044$ , d.f. = 6, p = 0.087           |
|                          | Education                  | $\chi^2 = 6.874$ , d.f. = 6, p = 0.333            |
|                          | Visitor/Resident           | $\chi^2 = 7.544$ , d.f. = 3, p = 0.056            |
|                          | Urban/Non-urban            | $\chi^2 = 2.866$ , d.f. = 3, p = 0.413            |
|                          | Coastal/Non-coastal        | $\chi^2 = 0.439$ , d.f. = 3, p = 0.932            |
| Harvesting               | Sex                        | $\chi^2 = 5.252$ , d.f. = 3, p = 0.154            |
|                          | <b>Age</b>                 | $\chi^2 = 17.660$ , d.f. = 6, <b>p &lt; 0.01</b>  |
|                          | Education                  | $\chi^2 = 7.198$ , d.f. = 6, p = 0.303            |
|                          | Visitor/Resident           | $\chi^2 = 2.806$ , d.f. = 3, p = 0.423            |
|                          | Urban/Non-urban            | $\chi^2 = 2.968$ , d.f. = 3, p = 0.397            |
|                          | Coastal/Non-coastal        | $\chi^2 = 2.946$ , d.f. = 3, p = 0.400            |
| Coastal erosion          | <b>Sex</b>                 | $\chi^2 = 11.182$ , d.f. = 3, <b>p &lt; 0.05</b>  |
|                          | <b>Age</b>                 | $\chi^2 = 20.720$ , d.f. = 6, <b>p &lt; 0.01</b>  |
|                          | <b>Education</b>           | $\chi^2 = 18.158$ , d.f. = 6, <b>p &lt; 0.01</b>  |
|                          | <b>Visitor/Resident</b>    | $\chi^2 = 9.561$ , d.f. = 3, <b>p &lt; 0.05</b>   |
|                          | Urban/Non-urban            | $\chi^2 = 5.289$ , d.f. = 3, p = 0.152            |
|                          | Coastal/Non-coastal        | $\chi^2 = 1.602$ , d.f. = 3, p = 0.659            |
| Local fishing            | <b>Sex</b>                 | $\chi^2 = 11.736$ , d.f. = 3, <b>p &lt; 0.01</b>  |
|                          | <b>Age</b>                 | $\chi^2 = 47.376$ , d.f. = 6, <b>p &lt; 0.01</b>  |
|                          | <b>Education</b>           | $\chi^2 = 41.234$ , d.f. = 6, <b>p &lt; 0.01</b>  |
|                          | Visitor/Resident           | $\chi^2 = 5.984$ , d.f. = 3, p = 0.112            |
|                          | Urban/Non-urban            | $\chi^2 = 6.77$ , d.f. = 3, p = 0.080             |
|                          | Coastal/Non-coastal        | $\chi^2 = 0.0684$ , d.f. = 3, p = 0.995           |

| <b>Question</b>         | <b>Profile</b>      | <b><math>\chi^2</math></b>                       |
|-------------------------|---------------------|--------------------------------------------------|
| <b>Q8</b>               |                     |                                                  |
| Recreational activities | <b>Sex</b>          | $\chi^2 = 11.965$ , d.f. = 3, <b>p &lt; 0.01</b> |
|                         | Age                 | $\chi^2 = 10.738$ , d.f. = 6, p = 0.097          |
|                         | <b>Education</b>    | $\chi^2 = 17.585$ , d.f. = 6, <b>p &lt; 0.01</b> |
|                         | Visitor/Resident    | $\chi^2 = 1.340$ , d.f. = 3, p = 0.720           |
|                         | Urban/Non-urban     | $\chi^2 = 5.906$ , d.f. = 3, p = 0.116           |
|                         | Coastal/Non-coastal | $\chi^2 = 3.724$ , d.f. = 3, p = 0.293           |
